# Supplementary material
Source: PubMed Central journal article supplement (PMC7103933)
Supplement: mmc2.pdf [file mmc2.pdf]

Pearson correlation [0.0%-100.0%]

PFGE

PFGE

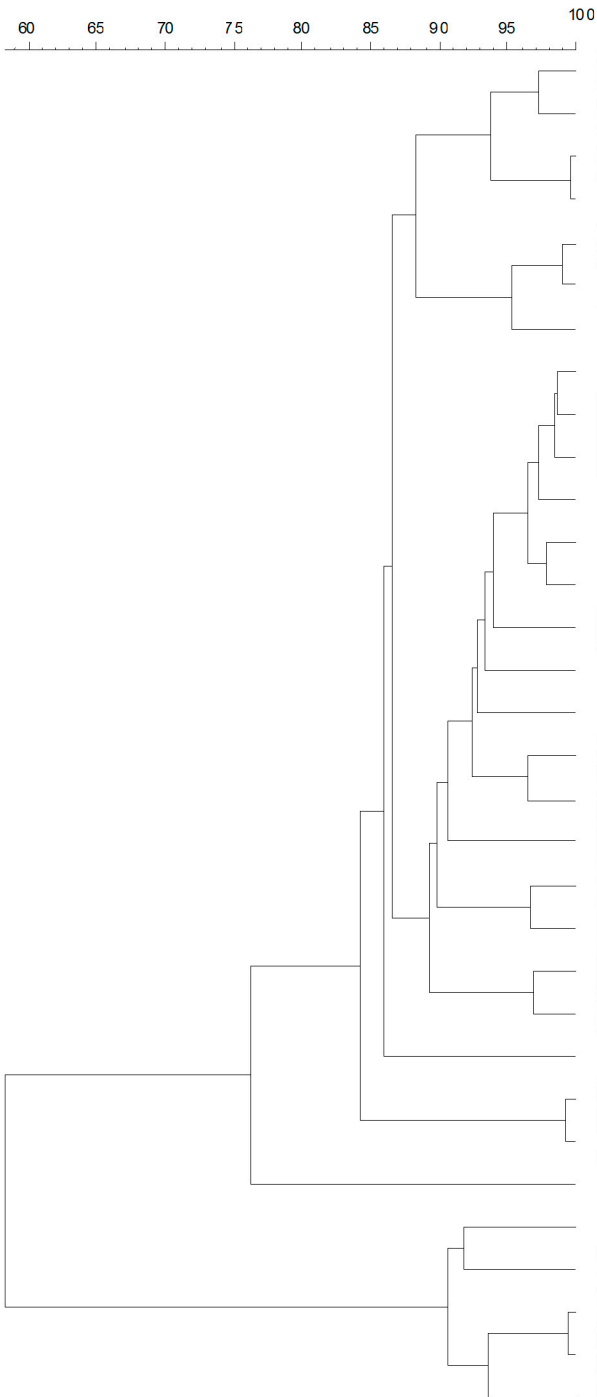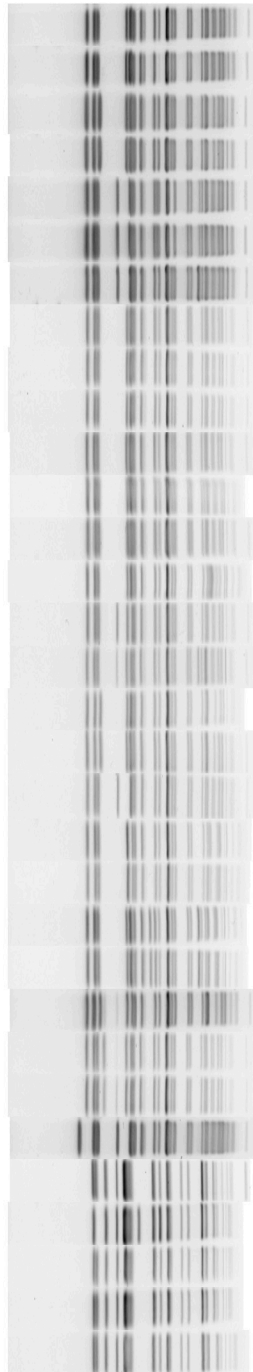

| No.  | City | PFGE |
|------|------|------|
| AS30 | CZ   | SA1a |
| AS31 | CZ   | SA1b |
| AS34 | YZ   | SA1c |
| AS35 | YZ   | SA1d |
| AS32 | CZ   | SA1e |
| AS33 | CZ   | SA1f |
| AS36 | WX   | SA1g |
| AS20 | CZ   | SA1h |
| AS26 | ZJ   | SA1i |
| AS25 | CZ   | SA1j |
| AS21 | CZ   | SA1k |
| AS17 | SZ   | SA1l |
| AS18 | CZ   | SA1m |
| AS14 | SZ   | SA1n |
| AS19 | CZ   | SA1o |
| AS22 | CZ   | SA1p |
| AS10 | YZ   | SA1q |
| AS28 | YZ   | SA1r |
| AS27 | ZJ   | SA1s |
| AS13 | SZ   | SA1t |
| AS15 | SZ   | SA1o |
| AS11 | YZ   | SA1p |
| AS16 | SZ   | SA1q |
| AS29 | YZ   | SA1r |
| AS23 | CZ   | SA2a |
| AS24 | CZ   | SA2b |
| AS37 | WX   | SA3  |
| AS6  | YC   | SA4a |
| AS9  | ZJ   | SA4b |
| AS7  | ZJ   | SA4c |
| AS8  | ZJ   | SA4d |
| AS12 | YC   | SA4e |
