# Supplementary material
Source: PubMed Central journal article supplement (PMC7103933)
Supplement: mmc3.pdf [file mmc3.pdf]

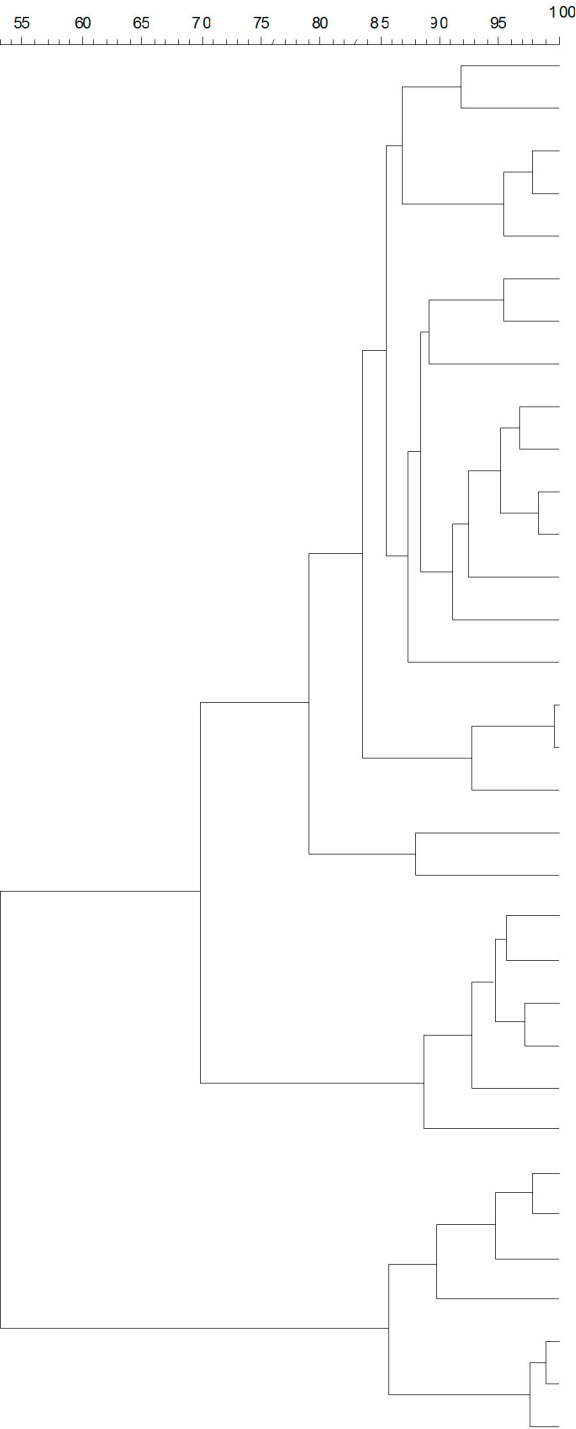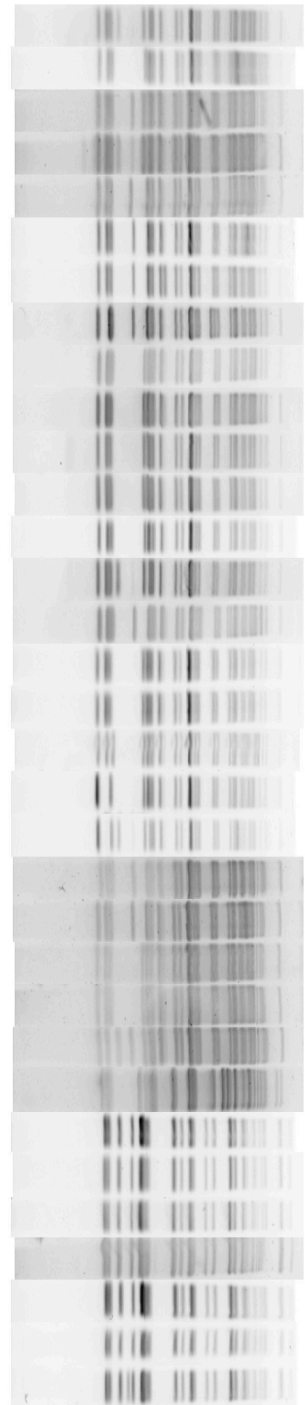

| No.  | City | PFGE |
|------|------|------|
| BS11 | CZ   | SB1a |
| BS13 | LYG  | SB1b |
| BS31 | CZ   | SB1c |
| BS32 | CZ   | SB1d |
| BS33 | YZ   | SB1e |
| BS15 | ZJ   | SB1f |
| BS16 | SZ   | SB1g |
| BS7  | ZJ   | SB1h |
| BS3  | SZ   | SB1i |
| BS6  | ZJ   | SB1j |
| BS10 | LYG  | SB1k |
| BS12 | XZ   | SB1l |
| BS21 | HA   | SB1m |
| BS9  | CZ   | SB1n |
| BS4  | NT   | SB1o |
| BS37 | CZ   | SB2a |
| BS47 | CZ   | SB2b |
| BS35 | ZJ   | SB2c |
| BS18 | SZ   | SB3a |
| BS20 | YZ   | SB3b |
| BS27 | SZ   | SB4a |
| BS28 | YZ   | SB4b |
| BS29 | ZJ   | SB4c |
| BS30 | ZJ   | SB4f |
| BS25 | ZJ   | SB4g |
| BS26 | CZ   | SB4h |
| BS17 | XZ   | SB5a |
| BS38 | CZ   | SB5b |
| BS40 | LYG  | SB5c |
| BS34 | LYG  | SB5d |
| BS14 | LYG  | SB5e |
| BS22 | YZ   | SB5f |
| BS23 | YC   | SB5g |
