# Supplementary material
Source: PubMed Central journal article supplement (PMC7103933)
Supplement: mmc6.pdf [file mmc6.pdf]

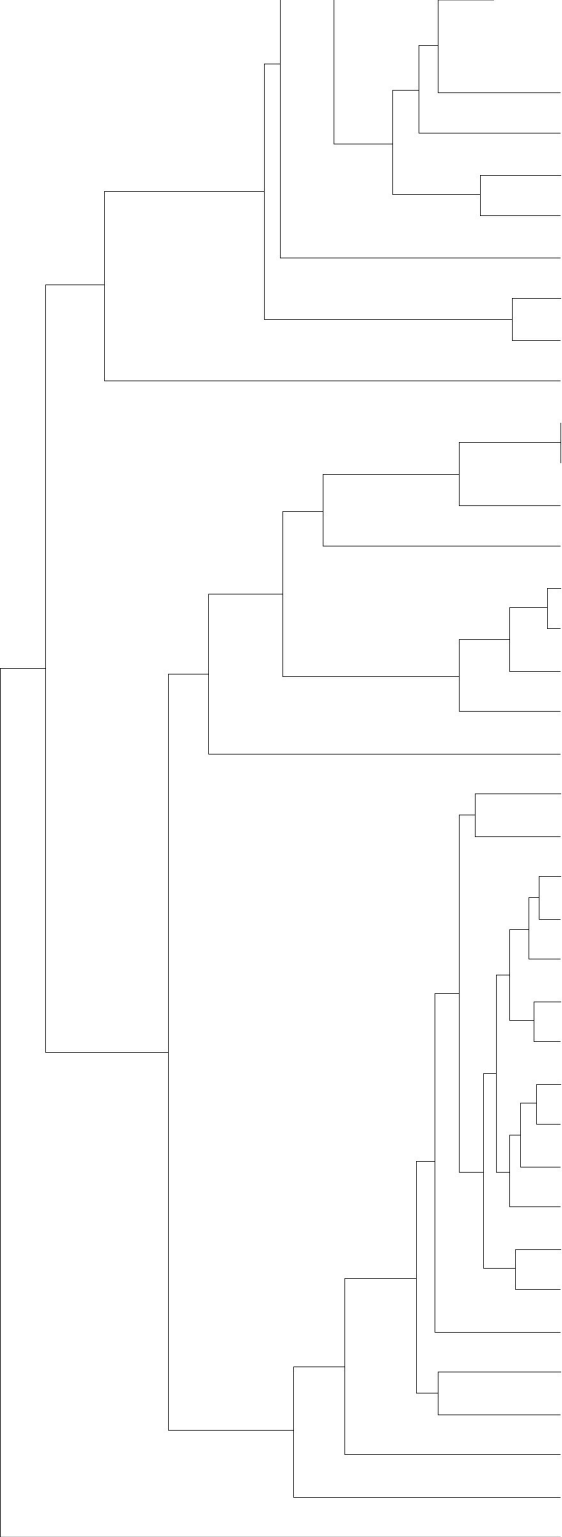

| No.  | City | PFGE  |
|------|------|-------|
| CS46 | NT   | SC12f |
| CS49 | NT   | SC13  |
| CS14 | CZ   | SC14a |
| CS34 | CZ   | SC14b |
| CS5  | NT   | SC1   |
| CS8  | CZ   | SC2a  |
| CS99 | CZ   | SC2b  |
| CS37 | NT   | SC15  |
| CS10 | NT   | SC16a |
| CS96 | NT   | SC16b |
| CS24 | CZ   | SC16c |
| CS2  | NT   | SC17a |
| CS61 | NT   | SC17b |
| CS66 | NT   | SC17c |
| CS9  | NT   | SC17d |
| CS74 | CZ   | SC17e |
| CS3  | NT   | SC18  |
| CS40 | NT   | SC19a |
| CS47 | CZ   | SC19b |
| CS23 | YZ   | SC19c |
| CS26 | NT   | SC19d |
| CS41 | CZ   | SC19e |
| CS25 | CZ   | SC19f |
| CS42 | CZ   | SC19g |
| CS48 | NT   | SC19g |
| CS51 | NT   | SC19i |
| CS57 | CZ   | SC19j |
| CS71 | CZ   | SC19k |
| CS35 | NT   | SC19l |
| CS36 | CZ   | SC19m |
| CS33 | CZ   | SC19n |
| CS18 | CZ   | SC19o |
| CS29 | NT   | SC19p |
| CS4  | NT   | SC20  |
| CS84 | NT   | SC21  |
| CS20 | CZ   | SC22  |
