# Supplementary material
Source: PubMed Central journal article supplement (PMC7103933)
Supplement: mmc7.pdf [file mmc7.pdf]

Pearson correlation [0.0%-100.0%]

PFGE

PFGE

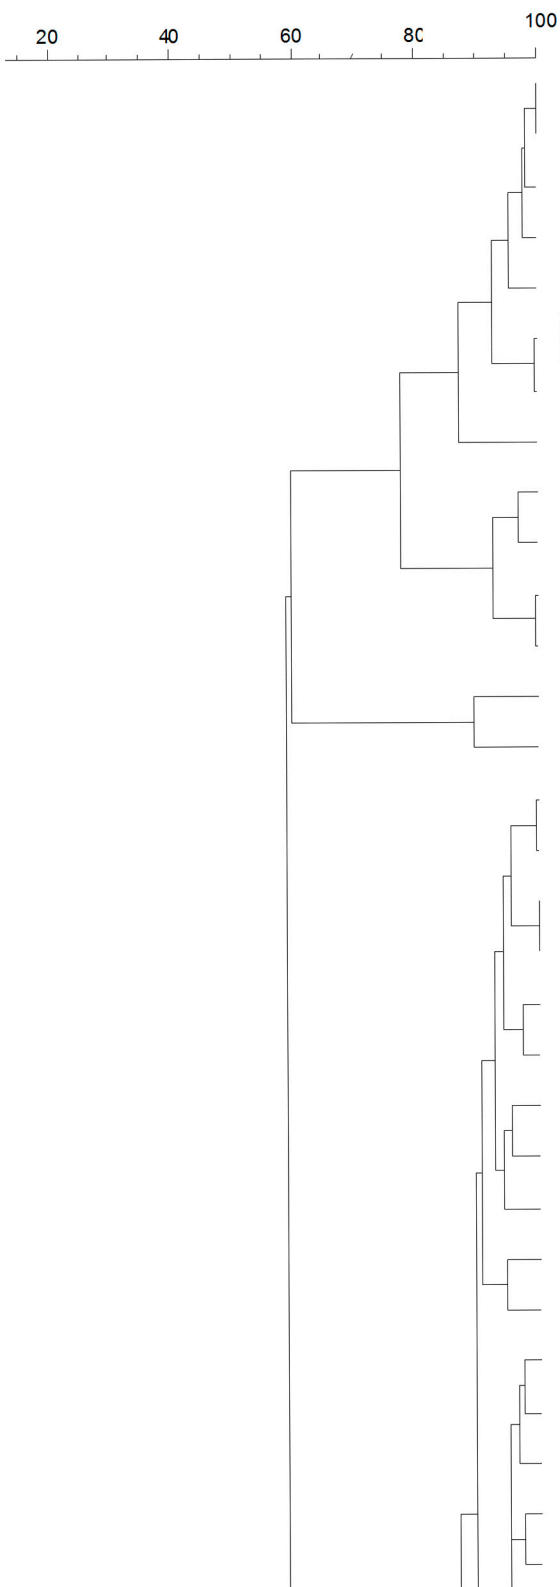

| No.  | City | PFGE |
|------|------|------|
| DS5  | ZJ   | SD1a |
| DS89 | ZJ   | SD1a |
| DS16 | HA   | SD1b |
| DS7  | ZJ   | SD1c |
| DS3  | ZJ   | SD1e |
| DS70 | HA   | SD1f |
| DS76 | HA   | SD1f |
| DS29 | LYG  | SD1g |
| DS74 | CZ   | SD2a |
| DS84 | NJ   | SD2b |
| DS67 | LYG  | SD2c |
| DS82 | LYG  | SD3  |
| DS36 | YC   | SD4a |
| DS44 | HA   | SD4b |
| DS1  | WX   | SD5a |
| DS2  | WX   | SD5a |
| DS4  | WX   | SD5b |
| DS75 | ZJ   | SD5b |
| DS15 | SZ   | SD5c |
| DS18 | WX   | SD5d |
| DS13 | SZ   | SD5e |
| DS24 | LYG  | SD5f |
| DS32 | NJ   | SD5g |
| DS22 | NJ   | SD5h |
| DS26 | NJ   | SD5i |
| DS30 | ZJ   | SD5j |
| DS33 | XZ   | SD5k |
| DS17 | SZ   | SD5l |
| DS25 | WX   | SD5m |
| DS6  | WX   | SD5n |
