# Supplementary material
Source: PubMed Central journal article supplement (PMC7103933)
Supplement: mmc10.pdf [file mmc10.pdf]

4C 50 60 70 80 90 100

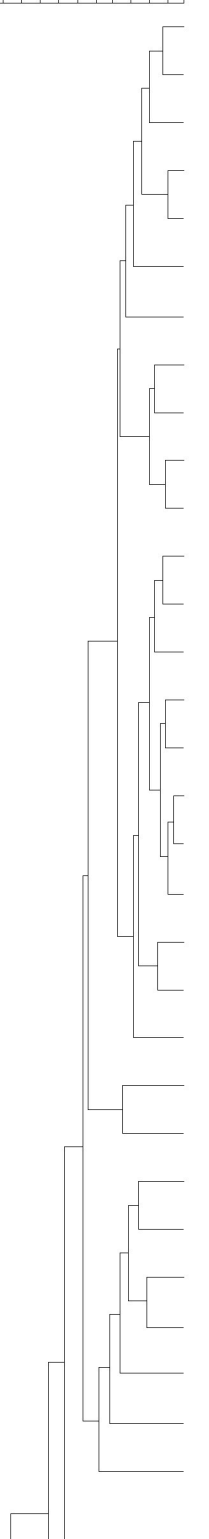

| No.  | City | PFGE           |
|------|------|----------------|
| ES13 | XZ   | SE1a           |
| ES33 | LYG  | SE1b           |
| ES19 | XZ   | SE1c           |
| ES41 | LYG  | SE1d           |
| ES43 | XZ   | SE1e           |
| ES14 | CZ   | SE1f           |
| ES21 | XZ   | SE1g           |
| ES1  | CZ   | SE1h           |
| ES6  | CZ   | SE1i           |
| ES36 | CZ   | SE1j           |
| ES44 | CZ   | SE1k           |
| ES15 | CZ   | SE1l           |
| ES26 | CZ   | SE1m           |
| ES39 | XZ   | SE1n           |
| ES34 | CZ   | SE1o           |
| ES37 | CZ   | SE1p           |
| ES11 | CZ   | SE1q           |
| ES9  | CZ   | SE1r           |
| ES7  | CZ   | SE1s           |
| ES46 | CZ   | SE1t           |
| ES47 | TZ   | SE1u           |
| ES45 | CZ   | SE1v           |
| ES38 | TZ   | SE1w           |
| ES48 | XZ   | SE1x           |
| ES29 | XZ   | SE1y           |
| ES40 | XZ   | SE1z           |
| ES24 | XZ   | SE1 $\alpha$   |
| ES30 | XZ   | SE1 $\beta$    |
| ES16 | XZ   | SE1 $\gamma$   |
| ES3  | XZ   | SE1 $\delta$   |
| ES50 | SZ   | SE1 $\epsilon$ |
