# Supplementary material
Source: PubMed Central journal article supplement (PMC7103933)

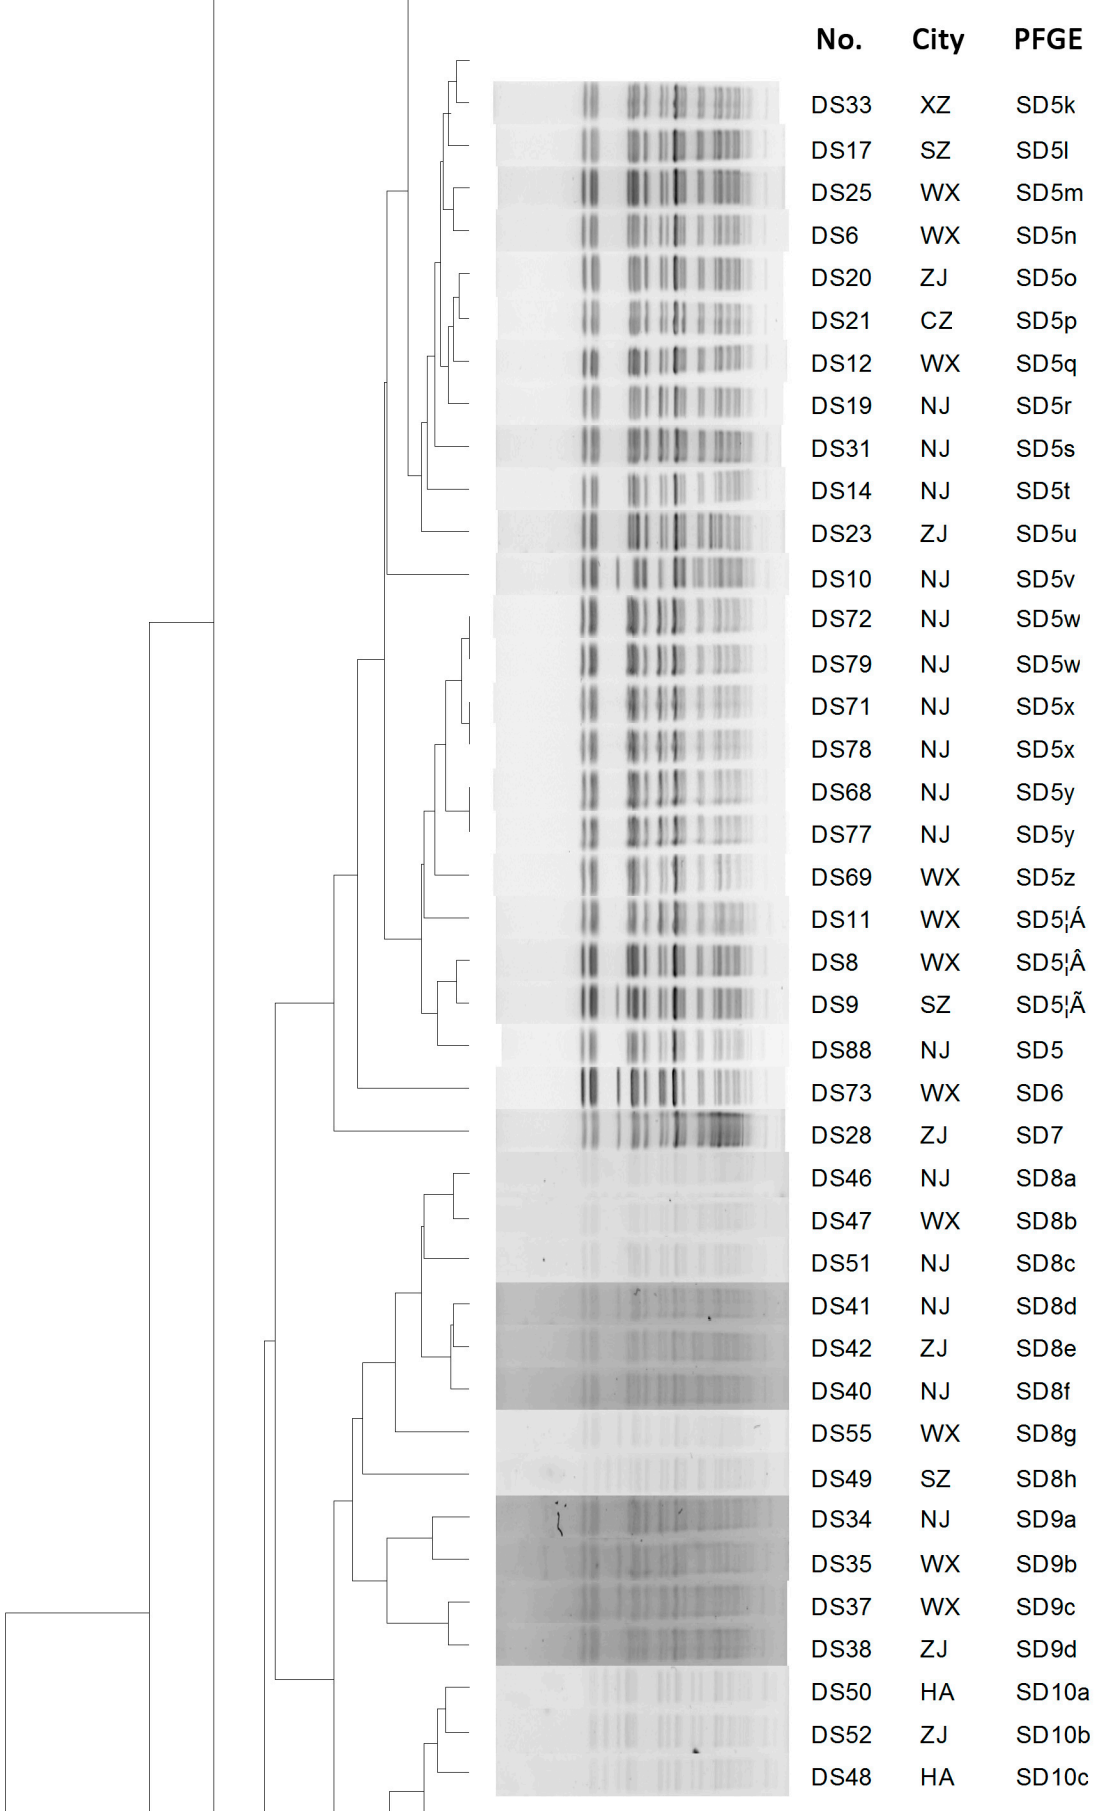

Supplement: mmc8.pdf [file mmc8.pdf]
